# Supplementary material for: Cerebrospinal Fluid α-Synuclein Species in Cognitive and Movements Disorders
Source: PubMed Central journal article supplement (PMC7830324; doi:10.3390/brainsci11010119), 2021-01-17
Supplement: brainsci-11-00119-s001.pdf [file brainsci-11-00119-s001.pdf]

|                                                                | cut-off          | AUC (SD) | Sig.  | Sens. | Spec. | LR  | YI   |
|----------------------------------------------------------------|------------------|----------|-------|-------|-------|-----|------|
| <i>All patients</i>                                            |                  |          |       |       |       |     |      |
| <i>t-<math>\alpha</math>-syn</i>                               | $\leq 865$ pg/ml | 0.687    | 0.034 | 86%   | 59%   | 2.1 | 0.45 |
| <i>Patients with no blood contamination</i>                    |                  |          |       |       |       |     |      |
| <i>t-a-syn</i>                                                 | $\leq 865$ pg/ml | 0.828    | 0.002 | 94%   | 69%   | 3.1 | 0.63 |
| <i>pS129-<math>\alpha</math>-syn/t-<math>\alpha</math>-syn</i> | $\geq 0.122$     | 0.749    | 0.021 | 71%   | 77%   | 3.1 | 0.48 |

**Sup. Table 1.** ROC curve analysis of a-syn for the discrimination of synucleinopathies from tauopathies. AUC: area under the curve; Sens: sensitivity; spec: specificity; LR: Likelihood ratio; YI: Youden's index

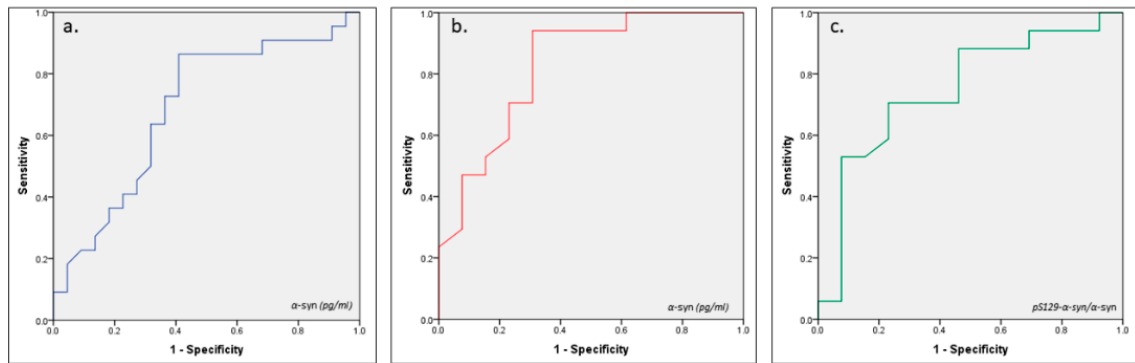

**Sup. Figure 1.** Receiver Operating Characteristic (ROC) curve analyses of the diagnostic accuracy of various  $\alpha$ -syn species for the differential diagnosis of synucleinopathies from tauopathies. a: CSF  $\alpha$ -syn in all patients; b: CSF  $\alpha$ -syn in patients after excluding CSF samples with blood contamination; c: CSF pS129- $\alpha$ -syn/ $\alpha$ -syn ratio in patients after excluding CSF samples with blood contamination.

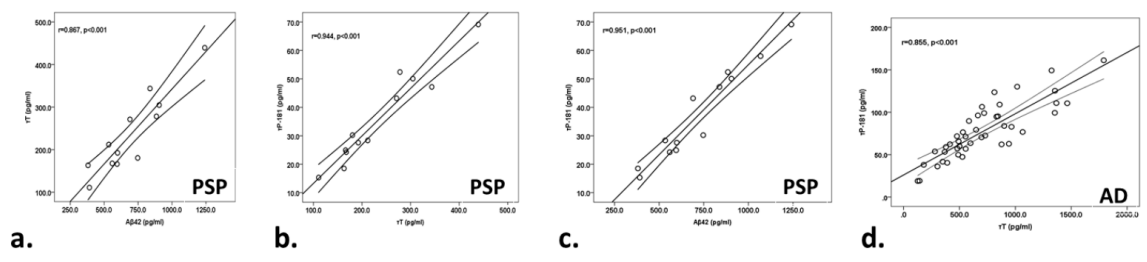

Sup. Figure 2 Scatterplots of Spearman correlations between CSF biomarkers.
